# Supplementary material for: QTL mapping and successful introgression of the spring wheat-derived QTL Fhb1 for Fusarium head blight resistance in three European triticale populations
Source: PubMed Central journal article supplement (PMC6985197; doi:10.1007/s00122-019-03476-0), 2020-01-20

**Article title:** QTL mapping and successful introgression of the spring wheat derived QTL *Fhb1* for Fusarium head blight resistance in three European triticale populations

**Journal:** Theoretical Applied Genetics

**Authors:** Ollier Marine<sup>1,2,3,6</sup>, Talle Vincent<sup>1</sup>, Brisset Anne-Laure<sup>1</sup>, Le Bihan Zoé<sup>1</sup>, Duerr Simon<sup>1,5</sup>, Lemmens Marc<sup>1</sup>, Goudemand Ellen<sup>3</sup>, Robert Olivier<sup>3,4</sup>, Hilbert Jean-Louis<sup>2</sup>, Buerstmayr Hermann<sup>1</sup>

1. BOKU-University of Natural Resources and Life Sciences Vienna, Department of Agrobiotechnology, IFA-Tulln, Institute of Biotechnology in Plant Production, Konrad Lorenz Str. 20, 3430 Tulln, Austria

2. EA 7394, USC INRA 1411, Institut Charles Viollette (ICV), Agro-food and biotechnology research institute, Université de Lille, INRA, ISA, Univ. Artois, Univ. Littoral Côte d'Opale, Cité Scientifique, 59655 Villeneuve d'Ascq, France

3. Florimond-Desprez Veuve & Fils SAS, 3 rue Florimond-Desprez, BP 41, 59242 Cappelle-en-Pévèle, France

4. Deceased on February 21, 2017

5. Current address: Saatzucht Donau GmbH & Co KG, Breeding Station Reichersberg, Austria.

6. Current address: Bayer Crop Science, Le petit Boissay, Toury, France.

**Corresponding author:** Marine Ollier, marine.ollier@bayer.com

**ESM\_1 :** Overview of the climatic conditions observed at IFA-Tulln (Austria) for the years 2014 to 2017, with the level of precipitation (mm) draw in solid line, and the average temperature (°C) draw in dashed line.

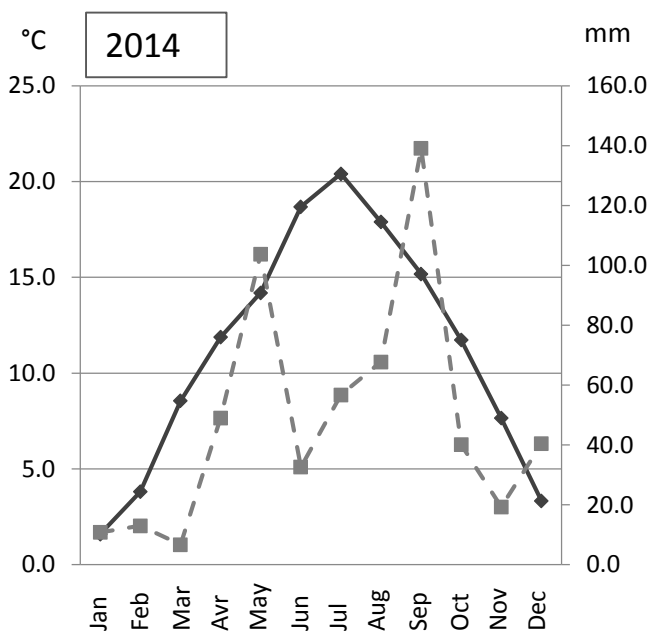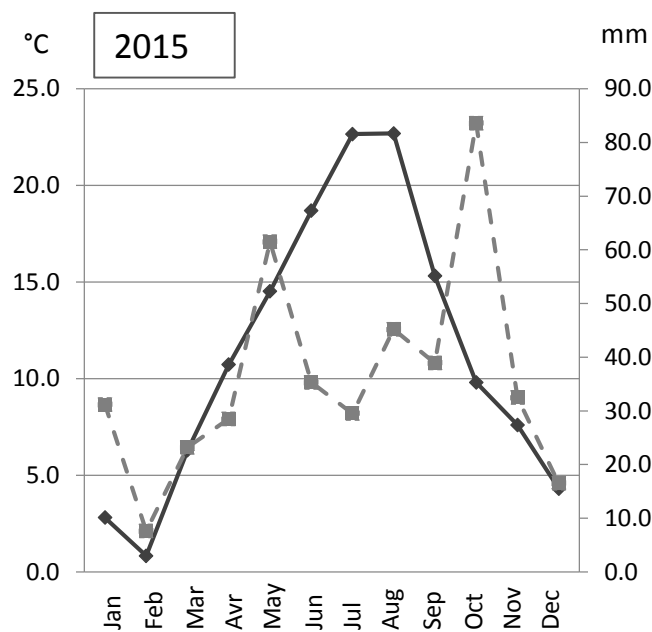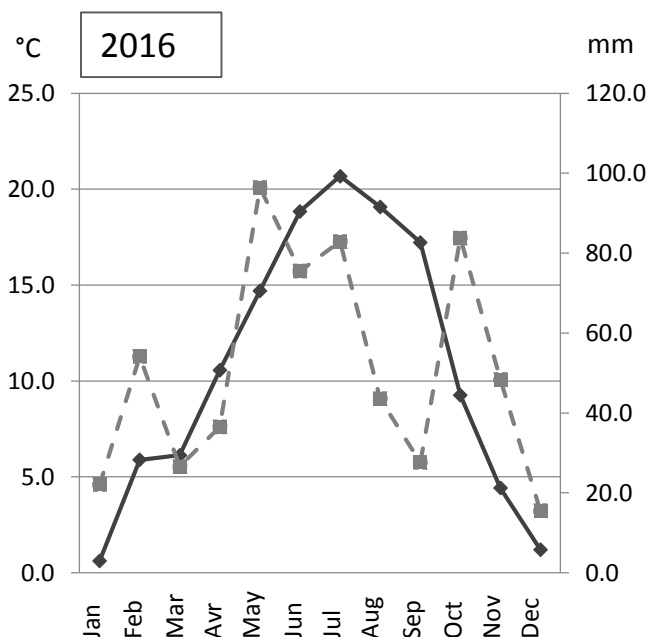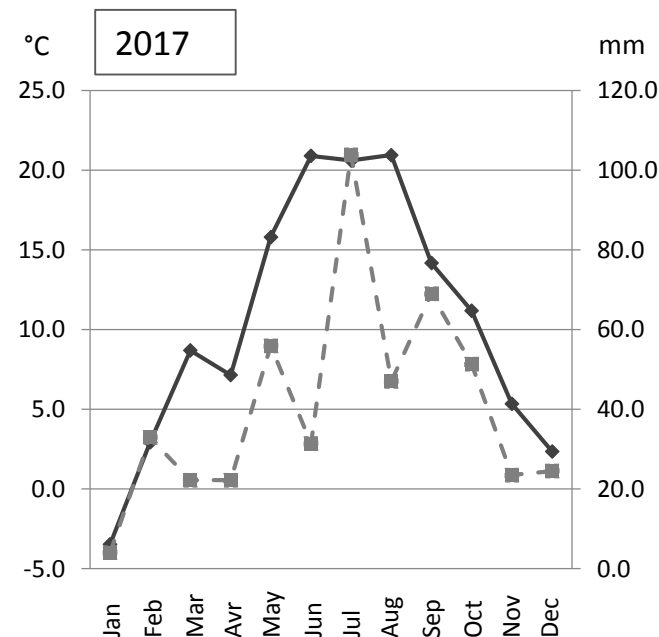

Supplement: 122_2019_3476_MOESM1_ESM.pdf [file 122_2019_3476_MOESM1_ESM.pdf]
