# Supplementary material for: QTL mapping and successful introgression of the spring wheat-derived QTL Fhb1 for Fusarium head blight resistance in three European triticale populations
Source: PubMed Central journal article supplement (PMC6985197; doi:10.1007/s00122-019-03476-0), 2020-01-20
Supplement: 122_2019_3476_MOESM3_ESM.pdf [file 122_2019_3476_MOESM3_ESM.pdf]

**Article title:** QTL mapping and successful introgression of the spring wheat derived QTL *Fhb1* for Fusarium head blight resistance in three European triticale populations

**Journal:** Theoretical Applied Genetics

**Authors:** Ollier Marine<sup>1,2,3,6</sup>, Talle Vincent<sup>1</sup>, Brisset Anne-Laure<sup>1</sup>, Le Bihan Zoé<sup>1</sup>, Duerr Simon<sup>1,5</sup>, Lemmens Marc<sup>1</sup>, Goudemand Ellen<sup>3</sup>, Robert Olivier<sup>3,4</sup>, Hilbert Jean-Louis<sup>2</sup>, Buerstmayr Hermann<sup>1</sup>

1. BOKU-University of Natural Resources and Life Sciences Vienna, Department of Agrobiotechnology, IFA-Tulln, Institute of Biotechnology in Plant Production, Konrad Lorenz Str. 20, 3430 Tulln, Austria
2. EA 7394, USC INRA 1411, Institut Charles Viollette (ICV), Agro-food and biotechnology research institute, Université de Lille, INRA, ISA, Univ. Artois, Univ. Littoral Côte d'Opale, Cité Scientifique, 59655 Villeneuve d'Ascq, France
3. Florimond-Desprez Veuve & Fils SAS, 3 rue Florimond-Desprez, BP 41, 59242 Cappelle-en-Pévèle, France
4. Deceased on February 21, 2017
5. Current address: Saatzucht Donau GmbH & Co KG, Breeding Station Reichersberg, Austria.
6. Current address: Bayer Crop Science, Le petit Boissay, Tournay, France.

**Corresponding author:** Marine Ollier, marine.ollier@bayer.com

**ESM3 Variance component estimates of genotype  $\sigma^2_{\text{Genotype}}$ , year  $\sigma^2_{\text{Year}}$ , block within year  $\sigma^2_{\text{Block within Year}}$ , genotype  $\times$  year  $\sigma^2_{\text{Genotype} \times \text{Year}}$  and the residual effects  $\sigma^2_{\text{error}}$  for FHB severity (AUDPC, WKS), plant height and flowering date across three experiments for populations T, AG, E**

Tulus x G8.06 (T) population

| Trait                | Variance component           |                          |                                       |                                                 |                           |
|----------------------|------------------------------|--------------------------|---------------------------------------|-------------------------------------------------|---------------------------|
|                      | $\sigma^2_{\text{Genotype}}$ | $\sigma^2_{\text{Year}}$ | $\sigma^2_{\text{Block within Year}}$ | $\sigma^2_{\text{Genotype} \times \text{Year}}$ | $\sigma^2_{\text{error}}$ |
| FHB severity (AUDPC) | 4.41E+03                     | 1.13E+05                 | 9.17E+02                              | 2.26E+03                                        | 8.39E+03                  |
| FHB severity (WKS)   | 9.79E-01                     | 3.53E-07                 | 1.40E-01                              | 2.68E-01                                        | 3.68E-01                  |
| Plant height         | 3.17E+01                     | 9.47E+01                 | 1.09E+01                              | 2.06E+00                                        | 2.87E+01                  |
| Flowering date       | 8.99E-01                     | 6.54E+00                 | 4.14E+00                              | 4.10E-16                                        | 1.20E+00                  |

(Agostino x Grenado) x G8.06 (AG) population

| Trait                | Variance component           |                          |                                       |                                                 |                           |
|----------------------|------------------------------|--------------------------|---------------------------------------|-------------------------------------------------|---------------------------|
|                      | $\sigma^2_{\text{Genotype}}$ | $\sigma^2_{\text{Year}}$ | $\sigma^2_{\text{Block within Year}}$ | $\sigma^2_{\text{Genotype} \times \text{Year}}$ | $\sigma^2_{\text{error}}$ |
| FHB severity (AUDPC) | 5.77E+03                     | 1.29E+05                 | 3.11E+03                              | 3.35E+03                                        | 7.02E+03                  |
| FHB severity (WKS)   | 6.93E-01                     | <1.0E-8                  | 3.13E-01                              | 1.08E-01                                        | 3.21E-01                  |
| Plant height         | 2.19E+02                     | 9.62E+01                 | 2.05E+01                              | 1.68E+01                                        | 2.04E+01                  |
| Flowering date       | 5.76E-01                     | 9.57E+00                 | 1.69E+00                              | 1.28E-01                                        | 9.87E-01                  |

El Paso x G8.06 (E) population

| Trait                | Variance component           |                          |                                       |                                                 |                           |
|----------------------|------------------------------|--------------------------|---------------------------------------|-------------------------------------------------|---------------------------|
|                      | $\sigma^2_{\text{Genotype}}$ | $\sigma^2_{\text{Year}}$ | $\sigma^2_{\text{Block within Year}}$ | $\sigma^2_{\text{Genotype} \times \text{Year}}$ | $\sigma^2_{\text{error}}$ |
| FHB severity (AUDPC) | 2.89E+03                     | 4.47E+04                 | 3.86E+03                              | 1.41E+03                                        | 5.33E+03                  |
| FHB severity (WKS)   | 3.62E-01                     | 8.92E-02                 | 1.37E-01                              | 7.21E-02                                        | 2.19E-01                  |
| Plant height         | 5.16E+01                     | 8.34E+01                 | 2.14E+01                              | 1.25E+00                                        | 2.66E+01                  |
| Flowering date       | 6.26E-01                     | 7.84E+00                 | 1.97E+00                              | 2.00E-10                                        | 1.11E+00                  |
